# Supplementary material
Source: HighWire-hosted journal article supplement (https://www.cmajopen.ca/highwire/filestream/89752/field_highwire_adjunct_files/1/open-2022-0135-2-at.pdf)
Supplement: open-2022-0135-2-at.pdf [file open-2022-0135-2-at.pdf]

## **Appendix 2 – Talking Circle Procedures**

In both talking circles, participants were asked a series of questions relating to their experiences in health research and health care; ways that health care can be or has been improved in order to meet the needs of Indigenous populations; and, they were asked to provide examples of health care and health research priorities. Each round began with the introduction of the research question to the talking circle by a member of the research team, followed by a personal example that addressed the specific question. A symbolic object of power, such as a talking stick, was then circulated, which provided the object holder with the opportunity to share their stories and experiences on a given research subject. When a participant was done sharing, they would then pass the object to the next participant and this process was repeated for each of the research subject areas. As part of this process, the research team also participated in the talking circle and we had the opportunity to introduce ourselves and share our experiences, insight, and intent. This process and approach has been used and described in previous health research studies (1-4).

1. Struthers R, Hodge FS, Geishirt-Cantrell B, De Cora L. Participant experiences of talking circles on type 2 diabetes in two Northern Plains American Indian tribes. *Qual Health Research*. 2003;13(8):1094-115. DOI: 10.1177/104973230325.
2. Hodge FS, Fredericks L, Rodriguez B. American Indian women's talking circle: A cervical cancer screening and prevention project. *Cancer*. 1996;78(S7):1592-7. DOI: 10.1002/(SICI)1097-0142(19961001)78:7+<1592::AID-CNCR13>3.0.CO;2-0.
3. Daley CM, James AS, Barnoskie RS, Segraves M, Schupbach R, Choi WS. “Tobacco has a purpose, not just a past” : feasibility of developing a culturally appropriate smoking cessation program for a pan - Tribal Native population. *Medical Anthropology Quarterly*. 2006;20(4):421-40. DOI: 10.1525/maq.2006.20.4.421.
4. Haozous EA, Eschiti V, Lauderdale J, Hill C, Amos C. Use of the talking circle for Comanche women’s breast health education. *J Transcultural Nursing*. 2010;21(4):377-85. DOI: 10.1177/1043659609360.
